# Supplementary material for: Dual-emissive nanocomposites based on Eu(iii) functionalized Cu(i)-coordination polymer for ratiometric fluorescent sensing and integrating Boolean logic operations
Source: Royal Society of Chemistry journal article supplement (doi:10.1039/c8tc01425f), 2018-01-01
Supplement: c8tc01425f1.pdf [file c8tc01425f1.pdf]

## Electronic Supplementary Information

### **Dual-emissive nanocomposites based on Eu(III) functionalized Cu(I)-coordination polymer for ratiometric fluorescent sensing and integrating Boolean logic operations**

Xubin Zheng,<sup>a</sup> Ruiqing Fan,<sup>\*a</sup> Kai Xing,<sup>a</sup> Ani Wang,<sup>a</sup> Xi Du,<sup>a</sup> Ping Wang<sup>a</sup> and Yulin Yang<sup>\*a</sup>

<sup>a</sup> *MIIT Key Laboratory of Critical Materials Technology for New Energy Conversion and Storage, School of Chemistry and Chemical Engineering, Harbin Institute of Technology, Harbin 150001, P. R. of China*

\*Corresponding Author: Ruiqing Fan and Yulin Yang

**E-mail:** [fanruiqing@hit.edu.cn](mailto:fanruiqing@hit.edu.cn) and [ylyang@hit.edu.cn](mailto:ylyang@hit.edu.cn)

## Experimental

### Materials and methods

All reagents and solvents were purchased from commercial sources and were used without further purification. Elemental analyses were carried out on a Perkin–Elmer 2400 automatic analyzer. FT–IR spectra data (4000–400  $\text{cm}^{-1}$ ) were collected by a Nicolet impact 410 FT–IR spectrometer. Scan electron microscope (SEM) images were recorded by Rili SU 8000HSD Series Hitachi New Generation Cold Field Emission SEM. The emission properties were recorded with Edinburgh FLS 920 fluorescence spectrometer equipped with a Peltier-cooled Hamamatsu R928 photomultiplier tube. An Edinburgh Xe900 450 W xenon arc lamp was used as an exciting light source. Thermal analysis was performed on a ZRY-2P thermogravimetric analysis from 30 to 700 °C with a heating rate of 10 °C  $\text{min}^{-1}$  under a flow of air. Powder X-ray diffraction (PXRD) patterns were recorded in the  $2\theta$  range of 5 – 50° using Cu  $K\alpha$  radiation with a Shimadzu XRD-6000 X-ray diffractometer. Elemental analyses for Cu and Eu were conducted using a Perkin-Elmer Model Optima 3300 DV ICP spectrometer. Density functional theory (DFT) calculations were conducted by using the B3LYP/lanl2dz basis set implemented in the Gaussian 09 package. XPS experiments were carried out on a RBD upgraded PHI-5000C ESCA system (Perkin Elmer) with Mg  $K\alpha$  radiation ( $h\nu = 1253.6 \text{ eV}$ ).

### Synthesis of $[\text{Cu}^{\text{I}}(\text{cbpp})(\text{Hcbpp})]\cdot 3\text{H}_2\text{O}$ (Cu-COOH)

The mixture of CuI (0.05 mmol, 10 mg), Hcbpp (1-(4-carboxylbenzyl)-3-(pyrzin-2-yl) (0.1 mmol, 28 mg) and  $\text{Na}_2\text{SO}_3$  (0.2 mmol, 25 mg) in 6 mL component solvent ( $\text{CH}_3\text{CN}:\text{H}_2\text{O}=1:1$ ) was placed in a Teflon-lined autoclave (25 mL), sealed, and heated to 120 °C for 3 days. After the autoclave was cooled to room temperature at 10 °C  $\cdot \text{h}^{-1}$ , red block-shaped crystals suitable for single crystal X-ray crystallographic analysis were obtained. The mother liquor was decanted, and the crystals were rinsed three times with methanol and dried in air for 2 h. Yield:  $\approx 60 \%$  (based on CuI); IR (KBr): 3116(m), 1704(vs), 1618(vs), 1490(m), 1420(m), 1332(m), 1288(m), 1239(m), 1182(m),

1150(vs), 1077(m), 1039(m), 940(m), 859(s), 785(vs), 716(vs), 611(w), 548(w), 511(w), 461(w), 418(w); Elemental analysis calcd (%) for  $C_{30}H_{29}CuN_8O_7$ : C 53.16, H 4.28, N 16.54; found: C 53.17, H 4.28, N 16.53.

#### **Preparation of Eu(III)@Cu-COOH**

Eu(III)@Cu-COOH was prepared by immersing the Cu-COOH (100 mg) in aqueous nitrate salts solution of  $Eu(NO_3)_3 \cdot 6H_2O$  ( $0.1 \text{ mol} \cdot L^{-1}$ ) and heated to  $80^\circ C$  for 12 h. Subsequently, the sample was washed with distilled water three times to remove redundant Eu(III) ions on the surface. Finally, the product was collected by filtration and dried at  $60^\circ C$  in air. The yield of the Eu(III)@Cu-COOH product based on Cu-COOH was 75.6%.

#### **Preparation of Eu(III)@Hcbpp**

The mixture of  $Eu(NO_3)_3 \cdot 6H_2O$  (0.1 mmol, 44 mg) and Hcbpp (0.4 mmol, 112 mg) was dissolved in component solvent ( $CH_3CN$ :  $H_2O=1:4$ ) and heated to  $80^\circ C$  for 12 h. Subsequently, the solvent was removed and the residue was washed with distilled water three times to remove redundant Eu(III) ions on the surface. Finally, the product was collected by filtration and dried at  $60^\circ C$  in air. The yield of the Eu(III)@Hcbpp product based on Hcbpp was 56.4%.

#### **Fluorescent sensing experiments**

For the experiments of sensing various biologically species, powder samples of Eu(III)@Cu-COOH (3 mg) were introduced into HEPES buffer (3 mL) (10 mM, pH=7.4) of AA/ $H_2O_2$ ,  $H_2S$  and Fe(II), respectively. The mixtures were subsequently shaken to form suspensions for luminescent measurements. All the Fluorescence spectra were measured in HEPES buffer (10 mM, pH = 7.4) at an excitation of 330 nm.

**Table S1** Crystal data and structure refinement parameters of Cu-COOH

|                                              |                                                                      |
|----------------------------------------------|----------------------------------------------------------------------|
| Identification code                          | Cu-COOH                                                              |
| Empirical formula                            | C <sub>30</sub> H <sub>29</sub> CuN <sub>8</sub> O <sub>7</sub>      |
| CCDC                                         | 1587111                                                              |
| Formula mass                                 | 677.15                                                               |
| Crystal system                               | Monoclinic                                                           |
| Space group                                  | <i>P</i> 2 <sub>1</sub> /c                                           |
| <i>a</i> (Å)                                 | 14.088(5)                                                            |
| <i>b</i> (Å)                                 | 20.940(7)                                                            |
| <i>c</i> (Å)                                 | 11.306(4)                                                            |
| $\alpha$ (°)                                 | 90.00                                                                |
| $\beta$ (°)                                  | 113.423(4)                                                           |
| $\gamma$ (°)                                 | 90.00                                                                |
| <i>V</i> (Å <sup>3</sup> )                   | 3060.5(17)                                                           |
| <i>Z</i>                                     | 4                                                                    |
| <i>D</i> <sub>c</sub> /(g cm <sup>-3</sup> ) | 1.470                                                                |
| $\mu$ (Mo K $\alpha$ )/mm <sup>-1</sup>      | 0.775                                                                |
| <i>F</i> (000)                               | 1400                                                                 |
| $\theta$ range (°)                           | 1.85 – 25.00                                                         |
| Limiting indices                             | $-16 \leq h \leq 15$<br>$-24 \leq k \leq 24$<br>$-13 \leq l \leq 12$ |
| Data/Restraints/Parameters                   | 5382 / 0 / 415                                                       |
| GOF on <i>F</i> <sup>2</sup>                 | 1.078                                                                |
| <i>R</i> <sub>1</sub> <sup>a</sup>           | 0.0429                                                               |
| <i>wR</i> <sub>2</sub> <sup>b</sup>          | 0.1410                                                               |
| <i>R</i> <sub>1</sub>                        | 0.0601                                                               |
| <i>wR</i> <sub>2</sub>                       | 0.1520                                                               |

$$^a R_1 = \sum ||F_o| - |F_c|| / \sum |F_o|; ^b wR_2 = [\sum [w (F_o^2 - F_c^2)^2] / \sum [w (F_o^2)^2]]^{1/2}.$$

**Table S2** Selected bond lengths (Å) and bond angles (°) for Cu-COOH

|            |          |                 |           |
|------------|----------|-----------------|-----------|
| Cu-COOH    |          |                 |           |
| Cu(1)-N(2) | 2.044(2) | N(7)-Cu(1)-N(2) | 133.89(9) |
| Cu(1)-N(3) | 2.046(2) | N(7)-Cu(1)-N(3) | 124.19(8) |
| Cu(1)-N(6) | 2.077(2) | N(2)-Cu(1)-N(3) | 80.67(8)  |
| Cu(1)-N(7) | 2.020(2) | N(7)-Cu(1)-N(6) | 80.17(9)  |
|            |          | N(2)-Cu(1)-N(6) | 118.81(9) |
|            |          | N(3)-Cu(1)-N(6) | 125.74(9) |

**Table S3** Standard deviation calculation

| No.                                                      | Fluorescence intensity ( $I_{616}$ ) | Fluorescence intensity ( $I_{485}$ ) | $I_{616}/I_{485}$         |
|----------------------------------------------------------|--------------------------------------|--------------------------------------|---------------------------|
| 1                                                        | 2515.62 a.u.                         | 7769.34 a.u.                         | 3.088439                  |
| 2                                                        | 2500.23 a.u.                         | 7748.89 a.u.                         | 3.099271                  |
| 3                                                        | 2507.66 a.u.                         | 7760.78 a.u.                         | 3.094829                  |
| 4                                                        | 2499.77 a.u.                         | 7751.23 a.u.                         | 3.100777                  |
| 5                                                        | 2512.39 a.u.                         | 7766.56 a.u.                         | 3.091304                  |
| Average Value                                            | --                                   | --                                   | 3.094924                  |
| Standard Deviation ( $\sigma$ )                          | --                                   | --                                   | 0.000591                  |
| Slope ( $S$ ) for AA                                     | --                                   | --                                   | $0.00394\mu\text{M}^{-1}$ |
| Detection limit ( $3\sigma/S$ ) for AA                   | --                                   | --                                   | $0.45\mu\text{M}$         |
| Slope ( $S$ ) for $\text{H}_2\text{S}$                   | --                                   | --                                   | $0.00162\mu\text{M}^{-1}$ |
| Detection limit ( $3\sigma/S$ ) for $\text{H}_2\text{S}$ | --                                   | --                                   | $1.09\mu\text{M}$         |
| Slope ( $S$ ) for $\text{Fe(II)}$                        | --                                   | --                                   | $0.0103\mu\text{M}^{-1}$  |
| Detection limit ( $3\sigma/S$ ) for $\text{Fe(II)}$      | --                                   | --                                   | $0.17\mu\text{M}$         |

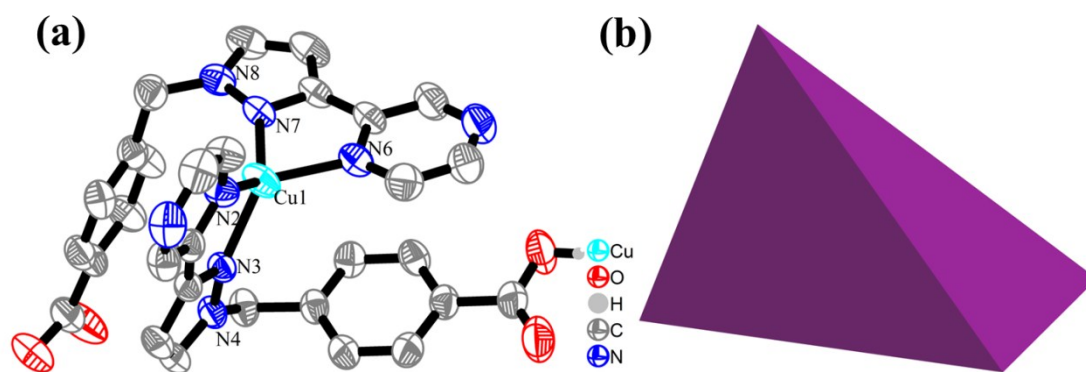**Fig. S1** (a) The structural unit of Cu-COOH with labeling scheme and 50% thermal ellipsoids (hydrogen atoms are omitted for clarity). (b) A distorted tetrahedron.

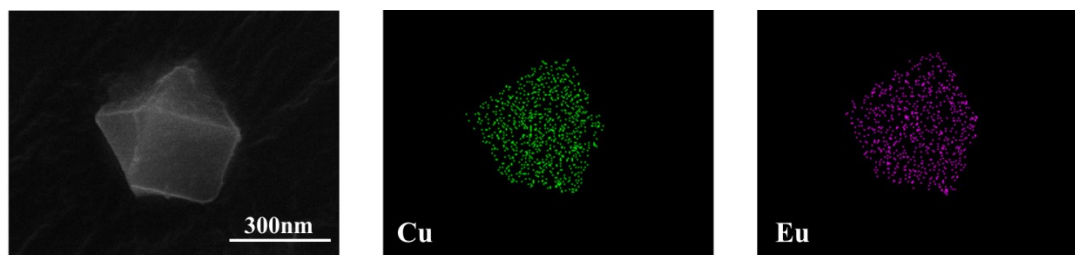

**Fig. S2** SEM images for Eu(III)@Cu-COOH, corresponding to the elemental mapping image of Eu(III)@Cu-COOH for the copper element and the europium element.

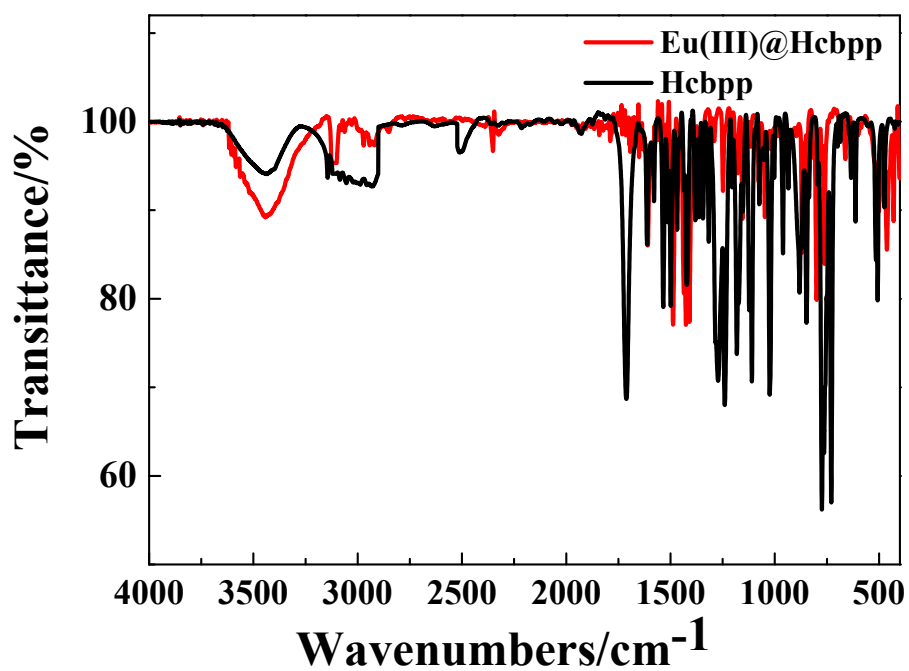

**Fig. S3** IR spectra of Hcbpp and Eu(III)@Hcbpp.

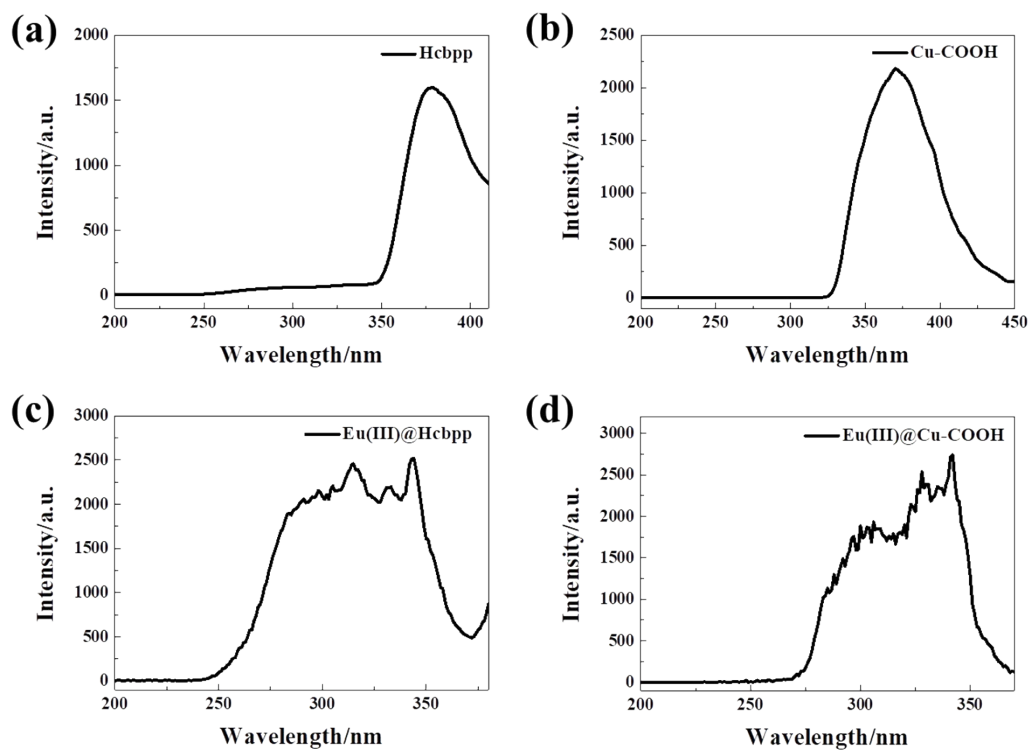

**Fig. S4** The excitation spectra of (a) Hcbpp, (b) Cu-COOH, (c) Eu(III)@Hcbpp and (d) Eu(III)@Cu-COOH.

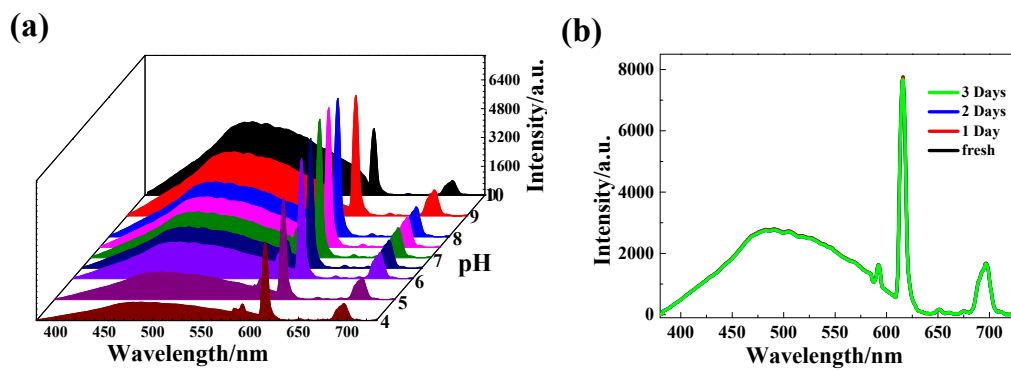

**Fig. S5** (a) Fluorescence spectra of Eu(III)@Cu-COOH with the pH varying from 4 to 10. (b) Fluorescence stability of Eu(III)@Cu-COOH.

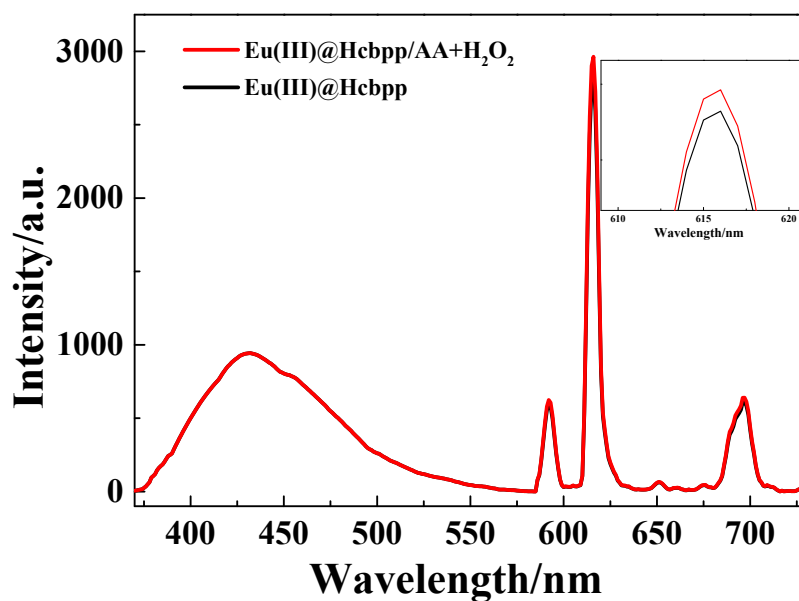

**Fig. S6** Fluorescence spectra of Eu(III)@Hcbpp and Eu(III)@Hcbpp with AA/H<sub>2</sub>O<sub>2</sub>.

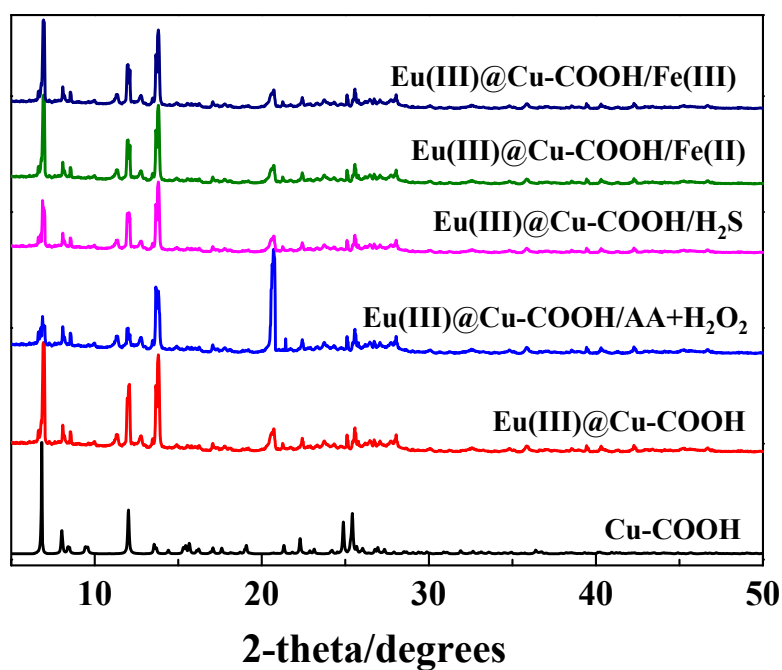

**Fig. S7** PXRD patterns of Eu(III)@Cu-COOH after the inclusion of AA/H<sub>2</sub>O<sub>2</sub>, H<sub>2</sub>S, Fe(II) and Fe(III).



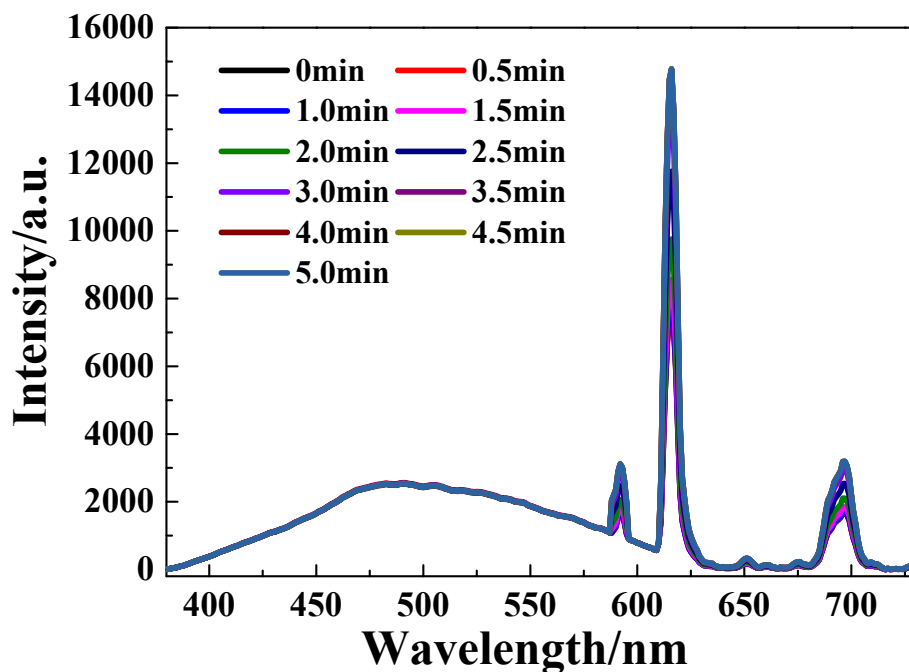

**Fig. S8** Fluorescence spectra of Eu(III)@Cu-COOH towards addition of AA/H<sub>2</sub>O<sub>2</sub> (2/10 mM) after 0-5 min.

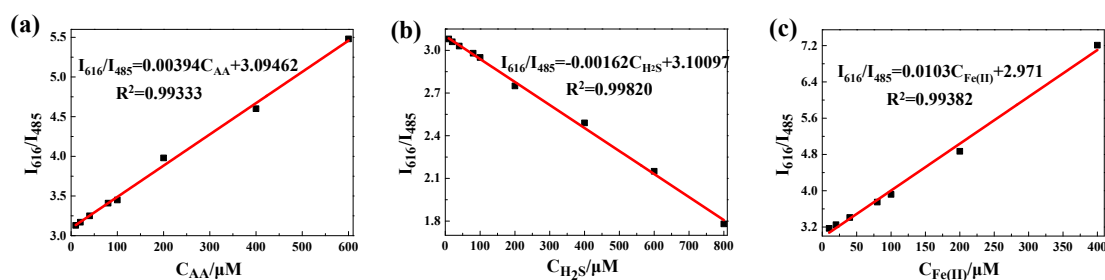

**Fig. S9** Concentration dependence of the fluorescence intensity ratio ( $I_{616}/I_{485}$ ) with (a) AA (0–600  $\mu$ M), (b) H<sub>2</sub>S (0–800  $\mu$ M) and (c) Fe(II) (0–400  $\mu$ M).

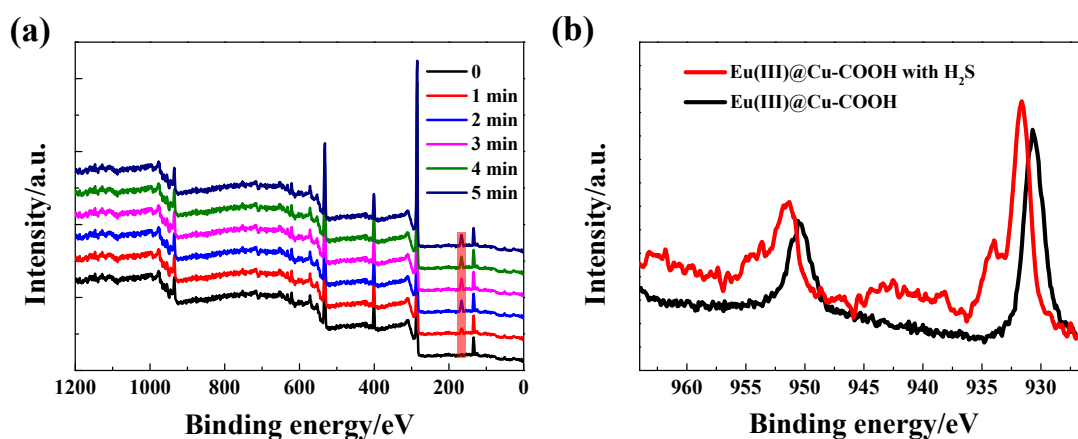

**Fig. S10** (a) XPS spectra for Eu(III)@Cu-COOH with H<sub>2</sub>S after 0-5min. (b) Cu 3p XPS for Eu(III)@Cu-COOH and Eu(III)@Cu-COOH with H<sub>2</sub>S.

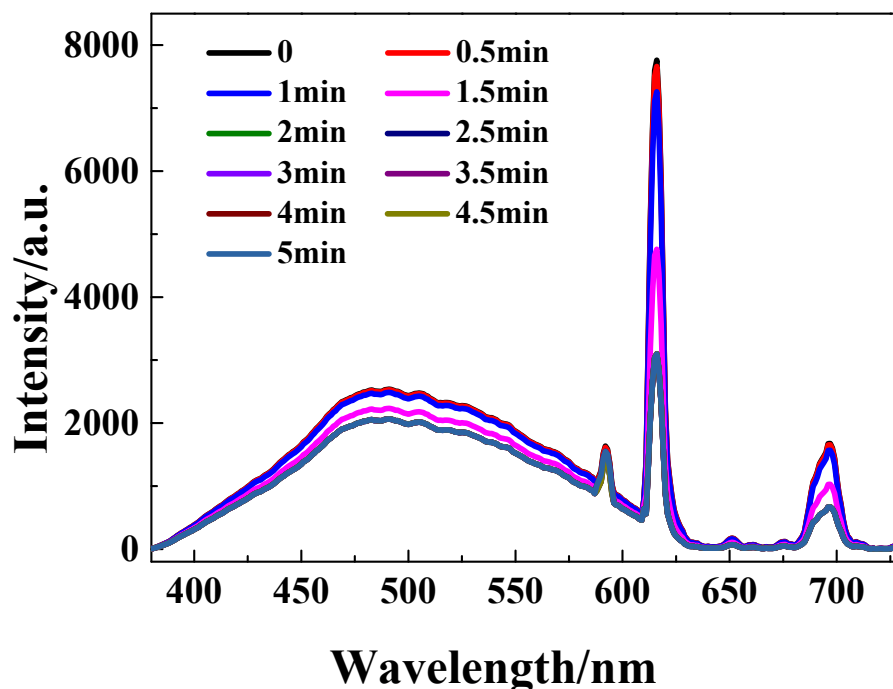

**Fig. S11** Fluorescence spectra of Eu(III)@Cu-COOH towards addition of H<sub>2</sub>S (2 mM) after 0-5 min.

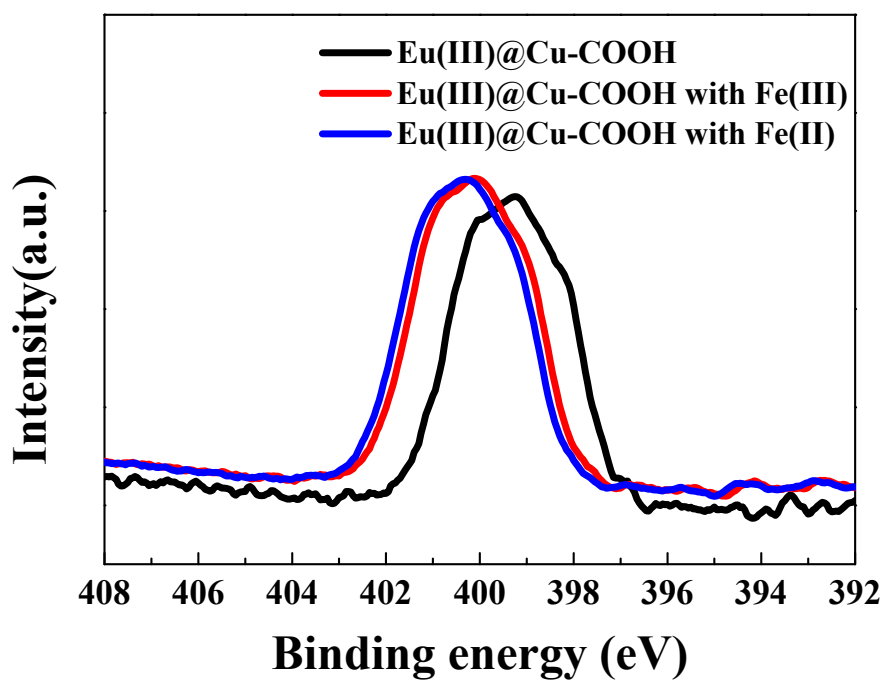

**Fig. S12** N 1s XPS for Eu(III)@Cu-COOH, Eu(III)@Cu-COOH with Fe(II) and Eu(III)@Cu-COOH with Fe(III).

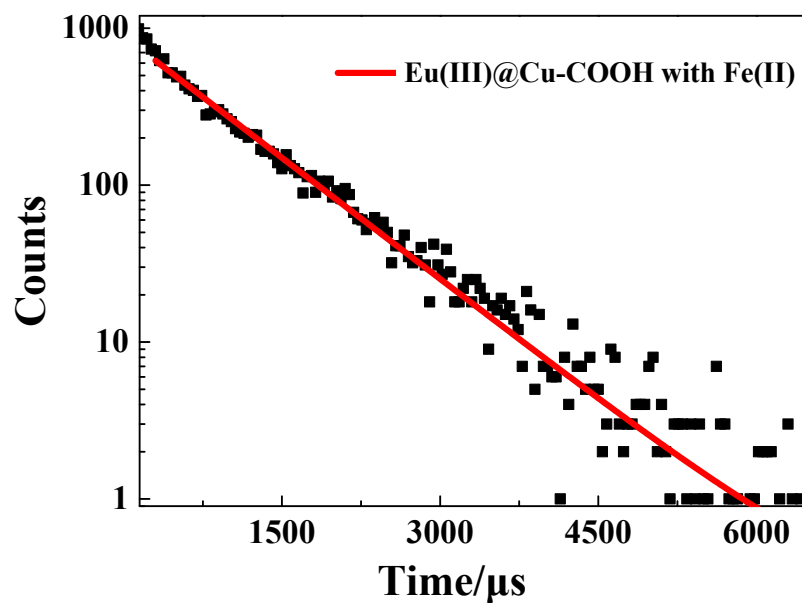

**Fig. S13** Fluorescence decay curves of Eu(III)@Cu-COOH with Fe(II).

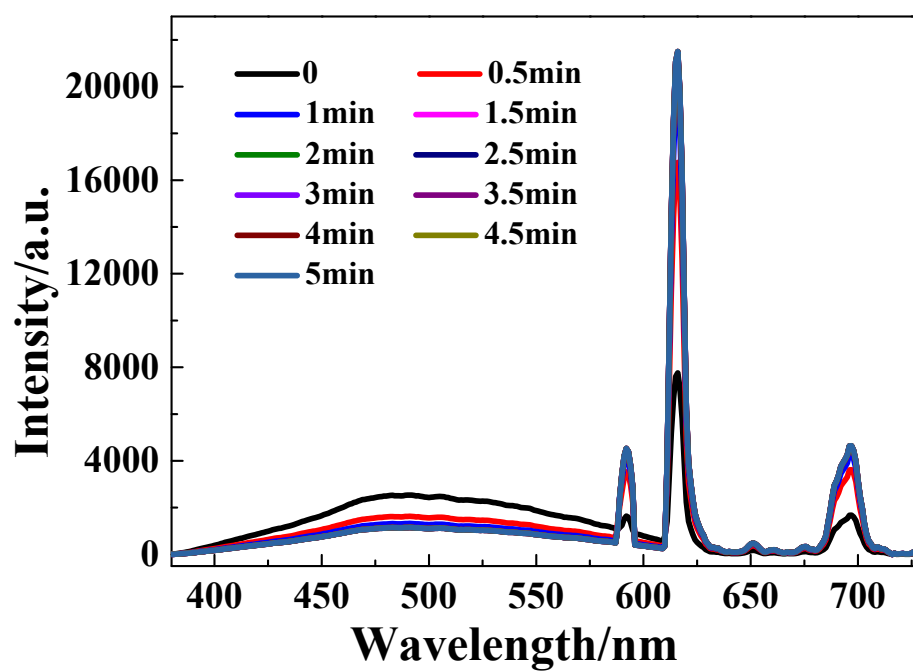

**Fig. S14** Fluorescence spectra of Eu(III)@Cu-COOH towards addition of Fe(II) (2 mM) after 0-5 min.

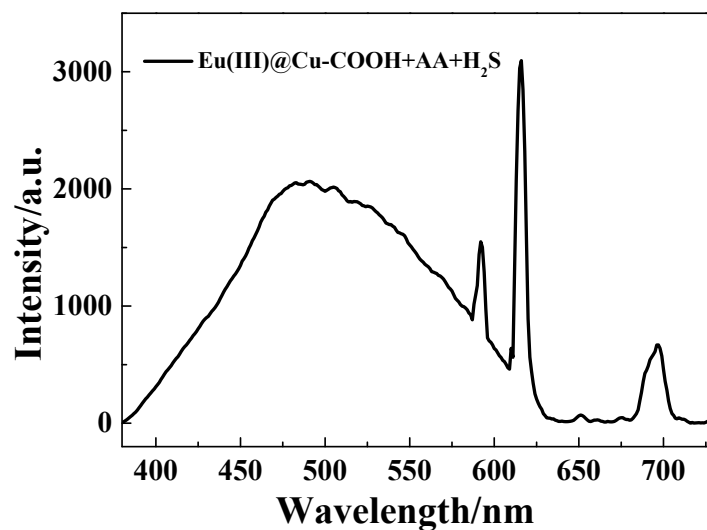

**Fig. S15** Fluorescence response spectra of Eu(III)@Cu-COOH with AA/H<sub>2</sub>S.

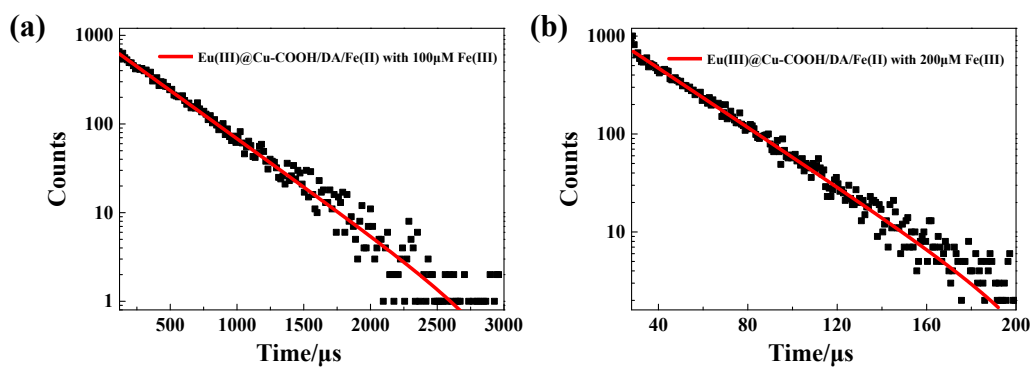

**Fig. S16** Fluorescence decay curves of Eu(III)@Cu-COOH/DA/Fe(II) with Fe(III).
